# Supplementary material
Source: HighWire-hosted journal article supplement (https://learnmem.cshlp.org/content/suppl/2023/09/07/30.8.169)
Supplement: Supplemental_Material.docx [file Supplemental_Material.docx]

A reward effect on memory retention, consolidation, and generalization? - Supplemental information

Heidrun Schultz, Hanna Stoffregen, Roland G. Benoit

2023

# 1. Supplemental methods

## 1.1 Sample

We recruited a total of 66 participants (mean age 25.6, range 19-34; 34 female, 32 male) from the research volunteer database of the Max Planck Institute for Human Cognitive and Brain Sciences. Before participation, they gave informed written consent. The study protocol was approved by the local ethics committee. Participants were native German speakers with normal or corrected-to-normal vision and without a history of psychiatric or neurological disorder. They received 9 €/hour and an additional bonus of up to 15 € depending on the points they received during the encoding task (i.e. 1€ if they received just over half the possible points, with a stepwise increase to 15€ if they received all possible points). In line with the preregistration, seven participants were excluded from data analysis for the following reasons: Self-reported bad sleep quality in the night before either experimental session as per the PSQI (Buysse et al., 1989) (six participants), or performance of less than 90% accuracy on the incidental encoding task (two participants). Of the remaining 59 participants, 29 were in the *immediate* group (mean age: 25.7, range 19-33; 14 female, 15 male) and 30 were in the *delayed* group (mean age: 25.9, range 19-34; 16 female, 14 male).

Note that our preregistration (<https://osf.io/35nbs/?view_only=acfb2cd5cc1a470596db82b87807be1e>) stipulated a final sample size of n=88 (44 per group), with a stopping criterion of n=60 (30 per group) after one year of data collection. The two sample sizes were calculated based on a desired power of *β*=.95 respectively *β*=.85 assuming an effect size of *d*=0.712 (time-dependent reward generalization effect, (Patil et al., 2017)) and a one-tailed two-sample *t*-test at *α*=.05 in G*Power (Faul et al., 2009). Due to ongoing COVID-19 restrictions, we could not replace all excluded participants, resulting in our final sample size of n=59. Using the same input parameters as above, our final sample size yields a power of *β*=.85.

## 1.2 Material

Stimuli consisted of four scene photographs depicting an office, a swimming pool, a circus tent, and a basketball court, as well as 160 object photographs. Each scene was paired with 40 objects. These are a selection of stimuli used in Gruber et al. (2016) and Brady et al. (2008). During the incidental encoding phase, participants responded to scene-specific questions for each scene-object pair (swimming pool: Does the object float? Basketball court: Is the object heavier than a basketball? Circus: Can one juggle with the object? Office: Is the object bigger than a laptop screen?) (Gruber et al., 2016).

## 1.3 Allocation of scene contexts, reward magnitude, and color cues

For each scene-object pair in the incidental encoding task, reward magnitude was signaled by a color cue. Per scene, two unique colors predicted either high or low reward (eight colors in total). Assignment of color cues to reward magnitude was randomized for each participant. Importantly, two of the scenes were typically – i.e. 80% of the time – presented with their respective high-reward color cue. The other two scenes were typically – i.e. 80% of the time – presented with their respective low-reward color cue. We aimed to counterbalance the possible combinations of scenes to typical reward magnitude across subjects and in each group. In our final included sample, each of the four scenes was paired with typical high reward in 13 to 16 participants in the *immediate* group, and in 12 to 17 participants in the *delayed* group.

## 1.4 Questionnaires

Participants completed a number of computerized questionnaires. At the beginning of part 1 and at the end of part 2, they completed the Positive and Negative Affect Schedule (PANAS) (Janke & Glöckner-Rist, 2012; Watson et al., 1988). Additionally, at the end of part 2, they completed the Vividness of Mental Imagery Questionnaire (VVIQ) (Marks, 1973), the Mind-Wandering Questionnaire (MWQ) (Mrazek et al., 2013), the Behavioral Inhibition and Activation scales (BIS/BAS) (Carver & White, 1994; Strobel et al., 2001), the Sensitivity to Punishment and Sensitivity to Reward Questionnaire (SPSRQ) (Hewig et al., in prep.; Torrubia et al., 2001), and the Pittsburgh Sleep Quality Index (PSQI) (Buysse et al., 1989; dgsm.de, n.d.). PSQI data were used for participant selection (see above); the rest of the questionnaire data were not analyzed.

## 1.5 Generalized linear mixed models (GLMMs)

We tested the influence of our experimental manipulations on encoding accuracy, encoding response times, scene recall accuracy, and reward recall accuracy. We therefore used Generalized Linear Mixed Models (GLMMs) in R 4.2.0 (afex::mixed) (Singmann et al., 2021). For accuracies, we set up binomial GLMMs with a logit link function. They were fit using maximum likelihood (Laplace approximation), and *p* values were calculated using likelihood ratio tests (LRT). For response times, the GLMMs were estimated using restricted maximum likelihood, and *p* values were calculated using the Satterthwaite method. We modelled the main effects and interactions of the fixed effects as well as random effects (by-subject random intercepts and slopes for reward, by-object random intercepts and slopes for reward, and correlations between random effects). If a model did not converge without warning, we successively simplified the random effect structure as suggested by (Singmann & Kellen, 2019) (see Table S1), and selected the most complex converging model.

**Table S****1**: Stepwise simplification of the random effect term.

| Model abbreviation | Random effect term | Meaning |
| --- | --- | --- |
| modelMax | (reward|subject) + (reward|object) | By-subject random intercepts and slopes for reward, by-object random intercepts and slopes for reward, and correlations between random effects |
| modelRed1 | (reward|subject) + (reward||object) | Remove correlation of by-object random effect parameters (i.e., estimation of the correlation between intercept and slope) |
| modelRed2 | (reward||subject) + (reward||object) | Additionally remove correlation of by-subject random effect parameters |
| modelRed3 | (reward||subject) + (1|object) | Remove by-object random slope |
| modelRed4 | (1|subject) + (1|object) | Additionally remove by-subject random slope |
| modelRed5 | (1|subject) | Additionally remove by-object random intercept |

# 2. Supplemental results

## 2.1 Descriptive analyses

### 2.1.1 Encoding accuracy

**Table S****2**: Means and standard deviations (SD) for encoding accuracy in all conditions.

| typicality | reward | mean accuracy | SD | n |
| --- | --- | --- | --- | --- |
| typical | high | 0.964 | 0.023 |  |
| typical | low | 0.959 | 0.026 |  |
| atypical | high | 0.971 | 0.033 |  |
| atypical | low | 0.969 | 0.037 |  |
|  |  |  |  | 59 |

### 2.1.2 Encoding RTs

**Table S****3**: Means and standard deviations (SD) for median encoding response times (RT) in all conditions.

| typicality | reward | mean median RT | SD | n |
| --- | --- | --- | --- | --- |
| typical | high | 387.809 | 132.324 |  |
| typical | low | 399.632 | 142.999 |  |
| atypical | high | 389.649 | 140.302 |  |
| atypical | low | 398.724 | 144.996 |  |
|  |  |  |  | 59 |

### 2.1.3 Scene recall

**Table S****4**: Means and standard deviations (SD) for scene recall accuracy in all conditions.

| time | typicality | reward | mean accuracy | SD | group mean | group SD | n |
| --- | --- | --- | --- | --- | --- | --- | --- |
| Immediate | typical | high | 0.778 | 0.120 |  |  |  |
| Immediate | typical | low | 0.765 | 0.129 |  |  |  |
| Immediate | atypical | high | 0.763 | 0.123 |  |  |  |
| Immediate | atypical | low | 0.754 | 0.152 |  |  |  |
|  |  |  |  |  | 0.769 | 0.101 | 29 |
| Delayed | typical | high | 0.654 | 0.155 |  |  |  |
| Delayed | typical | low | 0.627 | 0.168 |  |  |  |
| Delayed | atypical | high | 0.690 | 0.191 |  |  |  |
| Delayed | atypical | low | 0.621 | 0.201 |  |  |  |
|  |  |  |  |  | 0.643 | 0.143 | 30 |

### 2.1.4 Reward recall

**Table S****5**: Means and standard deviations (SD) for reward recall accuracy in all conditions.

| time | typicality | reward | mean accuracy | SD | group mean | group SD | n |
| --- | --- | --- | --- | --- | --- | --- | --- |
| Immediate | typical | high | 0.340 | 0.200 |  |  |  |
| Immediate | typical | low | 0.328 | 0.217 |  |  |  |
| Immediate | atypical | high | 0.282 | 0.198 |  |  |  |
| Immediate | atypical | low | 0.282 | 0.186 |  |  |  |
|  |  |  |  |  | 0.324 | 0.180 | 29 |
| Delayed | typical | high | 0.280 | 0.184 |  |  |  |
| Delayed | typical | low | 0.268 | 0.199 |  |  |  |
| Delayed | atypical | high | 0.225 | 0.164 |  |  |  |
| Delayed | atypical | low | 0.204 | 0.162 |  |  |  |
|  |  |  |  |  | 0.262 | 0.168 | 30 |

### 2.1.5 Scene recall by reward recall

**Table S****6**: Means and standard deviations (SD) for scene recall accuracies in all conditions, separately for correct and incorrect reward recall.

| time | typicality | rewardRecall | reward | mean accuracy | SD | n | group mean | group SD | group n |
| --- | --- | --- | --- | --- | --- | --- | --- | --- | --- |
| Immediate | typical | no | high | 0.718 | 0.137 | 29 |  |  |  |
| Immediate | typical | no | low | 0.727 | 0.139 | 29 |  |  |  |
| Immediate | typical | yes | high | 0.887 | 0.106 | 28 |  |  |  |
| Immediate | typical | yes | low | 0.832 | 0.176 | 28 |  |  |  |
| Immediate | atypical | no | high | 0.698 | 0.154 | 29 |  |  |  |
| Immediate | atypical | no | low | 0.745 | 0.170 | 29 |  |  |  |
| Immediate | atypical | yes | high | 0.915 | 0.113 | 24 |  |  |  |
| Immediate | atypical | yes | low | 0.797 | 0.244 | 26 |  |  |  |
|  |  |  |  |  |  |  | 0.769 | 0.101 | 29 |
| Delayed | typical | no | high | 0.592 | 0.191 | 30 |  |  |  |
| Delayed | typical | no | low | 0.579 | 0.195 | 30 |  |  |  |
| Delayed | typical | yes | high | 0.806 | 0.163 | 29 |  |  |  |
| Delayed | typical | yes | low | 0.707 | 0.180 | 28 |  |  |  |
| Delayed | atypical | no | high | 0.659 | 0.198 | 30 |  |  |  |
| Delayed | atypical | no | low | 0.612 | 0.225 | 30 |  |  |  |
| Delayed | atypical | yes | high | 0.781 | 0.299 | 27 |  |  |  |
| Delayed | atypical | yes | low | 0.617 | 0.369 | 24 |  |  |  |
|  |  |  |  |  |  |  | 0.643 | 0.143 | 30 |

### 2.1.6 Debriefing

**Table S****7**: Results of debriefing.

|  | Immediate | Delayed |
| --- | --- | --- |
| Did participants expect the surprise recall task? | 8 | 8 |
| If yes, did they use a memorization strategy? | 4 | 1 |
| Did participants notice the association between scenes and typical reward magnitude? | 10 | 5 |
| If yes, could participants explicitly match all scenes to their respective reward magnitude? | 4 | 3 |
| n | 29 | 30 |

### 2.1.7 Recall of color-reward associations

**Table S****8**: Means and standard deviations (SD) for recall accuracy of the color-reward associations in all conditions.

| time | typicality | reward | mean accuracy | SD | group mean | group SD | n |
| --- | --- | --- | --- | --- | --- | --- | --- |
| Immediate | typical | low | 0.983 | 0.093 |  |  |  |
| Immediate | typical | high | 0.966 | 0.129 |  |  |  |
| Immediate | atypical | low | 0.966 | 0.129 |  |  |  |
| Immediate | atypical | high | 0.931 | 0.175 |  |  |  |
|  |  |  |  |  | 0.961 | 0.068 | 29 |
| Delayed | typical | low | 0.933 | 0.217 |  |  |  |
| Delayed | typical | high | 0.950 | 0.153 |  |  |  |
| Delayed | atypical | low | 0.950 | 0.201 |  |  |  |
| Delayed | atypical | high | 0.950 | 0.153 |  |  |  |
|  |  |  |  |  | 0.946 | 0.091 | 30 |

## 2.2 Overall GLMMs (as in main article)

### 2.2.1 Encoding RTs

**Table S****9**: Encoding RTs: GLMM with the fixed factors reward and typicality and a reduced random effect structure (modelRed3).

|  | num Df | den Df | *F* | *p* |
| --- | --- | --- | --- | --- |
| **reward** | **1** | **96.434** | **6.245** | **0.014** |
| typicality | 1 | 18,069.085 | 0.021 | 0.884 |
| reward:typicality | 1 | 18,066.137 | 0.543 | 0.461 |

### 2.2.2 Scene recall

**Table S****10**: Scene recall: GLMM with the fixed factors time, reward, and typicality and the maximal random effect structure (modelMax).

|  | Df | χ² | χ Df | *p* |
| --- | --- | --- | --- | --- |
| **time** | **13** | **11.492** | **1** | **7e-04** |
| reward | 13 | 2.320 | 1 | 0.128 |
| typicality | 13 | 0.045 | 1 | 0.832 |
| time:reward | 13 | 1.614 | 1 | 0.204 |
| time:typicality | 13 | 1.518 | 1 | 0.218 |
| reward:typicality | 13 | 0.664 | 1 | 0.415 |
| time:reward:typicality | 13 | 2.428 | 1 | 0.119 |

### 2.2.3 Scene recall by reward recall

#### 2.2.3.1 GLMM

**Table S****11**: Scene recall by reward recall: GLMM with the fixed factors rewardRecall, time, reward, and typicality and the maximal random effect structure (modelMax).

|  | Df | χ² | χ Df | *p* |
| --- | --- | --- | --- | --- |
| **rewardRecall** | **21** | **77.456** | **1** | **1e-18** |
| **time** | **21** | **12.145** | **1** | **5e-04** |
| **reward** | **21** | **6.959** | **1** | **0.008** |
| typicality | 21 | 0.204 | 1 | 0.652 |
| rewardRecall:time | 21 | 1.604 | 1 | 0.205 |
| **rewardRecall:reward** | **21** | **9.930** | **1** | **0.002** |
| time:reward | 21 | 0.350 | 1 | 0.554 |
| rewardRecall:typicality | 21 | 1.432 | 1 | 0.231 |
| time:typicality | 21 | 0.044 | 1 | 0.833 |
| reward:typicality | 21 | 1.091 | 1 | 0.296 |
| rewardRecall:time:reward | 21 | 1.408 | 1 | 0.235 |
| rewardRecall:time:typicality | 21 | 1.668 | 1 | 0.196 |
| rewardRecall:reward:typicality | 21 | 0.335 | 1 | 0.563 |
| time:reward:typicality | 21 | 0.205 | 1 | 0.651 |
| rewardRecall:time:reward:typicality | 21 | 1.701 | 1 | 0.192 |

#### 2.2.3.2 Post-hoc comparisons for rewardRecall * reward interaction

**Table S****12**: Scene recall by reward recall: Follow-up paired comparisons for the reward * rewardRecall interaction.

| contrast | rewardRecall | estimate | SE | Df | *z-ratio* | *p* |
| --- | --- | --- | --- | --- | --- | --- |
| high - low | no | 0.026 | 0.098 | Inf | 0.265 | 0.791 |
| **high - low** | **yes** | **0.529** | **0.157** | **Inf** | **3.371** | **7e-04** |

## 2.3 Separate GLMMs for typical and atypical trials (as preregistered)

### 2.3.1 Encoding accuracy

#### 2.3.1.1 Typical items

**Table S****13**: Encoding accuracy (typical items): GLMM with the fixed factor reward and a reduced random effect structure (modelRed3).

|  | Df | χ² | χ Df | *p* |
| --- | --- | --- | --- | --- |
| reward | 4 | 1.371 | 1 | 0.242 |

####

#### 2.3.1.2 Atypical items

**Table S****14**: Encoding accuracy (atypical items): GLMM with the fixed factor reward and a reduced random effect structure (modelRed1).

|  | Df | χ² | χ Df | *p* |
| --- | --- | --- | --- | --- |
| reward | 6 | 0.027 | 1 | 0.869 |

### 2.3.2 Encoding RTs

#### 2.3.2.1 Typical items

**Table S****15**: Encoding RTs (typical items): GLMM with the fixed factor reward and a reduced random effect structure (modelRed4).

|  | num Df | den Df | *F* | *p* |
| --- | --- | --- | --- | --- |
| **reward** | **1** | **14,451.315** | **7.153** | **0.007** |

#### 2.3.2.2 Atypical items

**Table S****16**: Encoding RTs (atypical items): GLMM with the fixed factor reward and the maximal random effect structure (modelMax).

|  | num Df | den Df | *F* | *p* |
| --- | --- | --- | --- | --- |
| reward | 1 | 58.032 | 2.798 | 0.100 |

### 2.3.3 Scene recall

#### 2.3.3.1 Typical items

**Table S****17**: Scene recall (typical items): GLMM with the fixed factors time and reward and the maximal random effect structure (modelMax).

|  | Df | χ² | χ Df | *p* |
| --- | --- | --- | --- | --- |
| **time** | **9** | **14.648** | **1** | **1e-04** |
| reward | 9 | 0.574 | 1 | 0.449 |
| time:reward | 9 | 0.041 | 1 | 0.840 |

####

#### 2.3.3.2 Atypical items

**Table S****18**: Scene recall (atypical items): GLMM with the fixed factors time and reward and the maximal random effect structure (modelMax).

|  | Df | χ² | χ Df | *p* |
| --- | --- | --- | --- | --- |
| **time** | **9** | **7.706** | **1** | **0.006** |
| reward | 9 | 1.565 | 1 | 0.211 |
| time:reward | 9 | 1.558 | 1 | 0.212 |

### 2.3.4 Reward recall

#### 2.3.4.1 Typical items

**Table S****19**: Reward recall (typical items): GLMM with the fixed factors time and reward and a reduced random effect structure (modelRed3).

|  | Df | χ² | χ Df | *p* |
| --- | --- | --- | --- | --- |
| time | 6 | 0.978 | 1 | 0.323 |
| reward | 6 | 0.982 | 1 | 0.322 |
| time:reward | 6 | 0.006 | 1 | 0.937 |

#### 2.3.4.2 Atypical items

**Table S****20**: Reward recall (atypical items): GLMM with the fixed factors time and reward and a reduced random effect structure (modelRed4).

|  | Df | χ² | χ Df | *p* |
| --- | --- | --- | --- | --- |
| time | 5 | 1.974 | 1 | 0.160 |
| reward | 5 | 0.453 | 1 | 0.501 |
| time:reward | 5 | 0.458 | 1 | 0.499 |

### 2.3.5 Scene recall by reward recall

#### 2.3.5.1 Typical items

**Table S****21**: Scene recall by reward recall (typical items): GLMM with the fixed factors rewardRecall, time, and reward and the maximal random effect structure (modelMax).

|  | Df | χ² | χ Df | *p* |
| --- | --- | --- | --- | --- |
| **rewardRecall** | **13** | **126.360** | **1** | **3e-29** |
| **time** | **13** | **13.481** | **1** | **2e-04** |
| reward | 13 | 2.389 | 1 | 0.122 |
| rewardRecall:time | 13 | 0.002 | 1 | 0.969 |
| **rewardRecall:reward** | **13** | **8.078** | **1** | **0.004** |
| time:reward | 13 | 0.043 | 1 | 0.835 |
| rewardRecall:time:reward | 13 | 0.003 | 1 | 0.957 |

#### 2.3.5.2 Atypical items

**Table S****22**: Scene recall by reward recall (atypical items): GLMM with the fixed factors rewardRecall, time, and reward and a reduced random effect structure (modelRed3).

|  | Df | χ² | χ Df | *p* |
| --- | --- | --- | --- | --- |
| **rewardRecall** | **10** | **19.146** | **1** | **1e-05** |
| **time** | **10** | **8.978** | **1** | **0.003** |
| **reward** | **10** | **5.937** | **1** | **0.015** |
| rewardRecall:time | 10 | 2.608 | 1 | 0.106 |
| **rewardRecall:reward** | **10** | **5.535** | **1** | **0.019** |
| time:reward | 10 | 0.168 | 1 | 0.682 |
| rewardRecall:time:reward | 10 | 1.499 | 1 | 0.221 |

## 2.4 Additional power calculation for main effect of reward

Our procedure is based on Gruber et al. (2016), who obtained a medium-sized effect of reward on associative scene recall (*t*(18)=2.16, resulting in *dz*=2.16/√(19)= 0.4955, Lakens, 2013). An additional power calculation yields a power of *β*=.98 to replicate such a main effect of reward in our dataset (n=59, one-tailed paired *t*-test, *α*=.05) using G*Power (Faul et al., 2009).

# 3. Supplemental references

Brady, T. F., Konkle, T., Alvarez, G. A., & Oliva, A. (2008). Visual long-term memory has a massive storage capacity for object details. *Proceedings of the National Academy of Sciences of the United States of America*, *105*(38), 14325–14329. https://doi.org/10.1073/pnas.0803390105

Buysse, D. J., Reynolds, C. F., Monk, T. H., Berman, S. R., & Kupfer, D. J. (1989). The Pittsburgh Sleep Quality Index: A new instrument for psychiatric practice and research. *Psychiatry Research*, *28*(2), 193–213. https://doi.org/10.1016/0165-1781(89)90047-4

Carver, C. S., & White, T. L. (1994). Behavioral inhibition, behavioral activation, and affective responses to impending reward and punishment: The BIS/BAS Scales. *Journal of Personality and Social Psychology*, *67*(2), 319–333. https://doi.org/10.1037/0022-3514.67.2.319

dgsm.de. (n.d.). *Pittsburgh Schlafqualitätsindex (PSQI)*. Retrieved 27 March 2019, from https://www.dgsm.de/fachinformationen_frageboegen_psqi.php

Faul, F., Erdfelder, E., Buchner, A., & Lang, A.-G. (2009). Statistical power analyses using G*Power 3.1: Tests for correlation and regression analyses. *Behavior Research Methods*, *41*(4), 1149–1160. https://doi.org/10.3758/BRM.41.4.1149

Gruber, M. J., Ritchey, M., Wang, S.-F., Doss, M. K., & Ranganath, C. (2016). Post-learning Hippocampal Dynamics Promote Preferential Retention of Rewarding Events. *Neuron*, *89*(5), 1110–1120. https://doi.org/10.1016/j.neuron.2016.01.017

Hewig, J., Hagemann, D., & Riemann, R. (in prep.). *Übersetzte Version des Sensitivity of Punishment and Sensitivity of Reward Questionnaire (SPSRQ)*.

Janke, S., & Glöckner-Rist, A. (2012). Deutsche Version der Positive and Negative Affect Schedule (PANAS). *Zusammenstellung sozialwissenschaftlicher Items und Skalen (ZIS)*. https://doi.org/10.6102/ZIS146

Lakens, D. (2013). Calculating and reporting effect sizes to facilitate cumulative science: a practical primer for t-tests and ANOVAs. *Frontiers in Psychology*, *4*, 863. <https://doi.org/10.3389/fpsyg.2013.00863>

Marks, D. F. (1973). Visual imagery differences in the recall of pictures. *British Journal of Psychology (London, England: 1953)*, *64*(1), 17–24. https://doi.org/10.1111/j.2044-8295.1973.tb01322.x

Mrazek, M. D., Phillips, D. T., Franklin, M. S., Broadway, J. M., & Schooler, J. W. (2013). Young and restless: Validation of the Mind-Wandering Questionnaire (MWQ) reveals disruptive impact of mind-wandering for youth. *Frontiers in Psychology*, *4*, 560. https://doi.org/10.3389/fpsyg.2013.00560

Patil, A., Murty, V. P., Dunsmoor, J. E., Phelps, E. A., & Davachi, L. (2017). Reward retroactively enhances memory consolidation for related items. *Learning & Memory (Cold Spring Harbor, N.Y.)*, *24*(1), 65–69. https://doi.org/10.1101/lm.042978.116

Singmann, H., Bolker, B., Westfall, J., Aust, F., & Ben-Shachar, M. S. (2021). *afex: Analysis of Factorial Experiments.* (1.0-1.). https://CRAN.R-project.org/package=afex

Singmann, H., & Kellen, D. (2019). An Introduction to Mixed Models for Experimental Psychology. In *New Methods in Cognitive Psychology* (pp. 4–31). https://doi.org/10.4324/9780429318405-2

Strobel, A., Beauducel, A., Debener, S., & Brocke, B. (2001). Eine deutschsprachige Version des BIS/BAS-Fragebogens von Carver und White [A German-language version of Carver and White’s BIS/BAS scales]. *Zeitschrift für Differentielle und Diagnostische Psychologie*, *22*. https://doi.org/10.1024//0170-1789.22.3.216

Torrubia, R., Avila, C., Moltó, J., & Caseras, X. (2001). The Sensitivity to Punishment and Sensitivity to Reward Questionnaire (SPSRQ) as a measure of Gray’s Anxiety and Impulsivity dimensions. *Personality and Individual Differences*, *31*, 837–862. https://doi.org/10.1016/S0191-8869(00)00183-5

Watson, D., Clark, L. A., & Tellegen, A. (1988). Development and validation of brief measures of positive and negative affect: The PANAS scales. *Journal of Personality and Social Psychology*, *54*(6), 1063–1070. https://doi.org/10.1037//0022-3514.54.6.1063
